# Supplementary material
Source: Springer Nature journal article supplement (https://www.springermedizin.de/resource/supplementary/13011_2011_219_MOESM1_ESM.pdf/9628638)

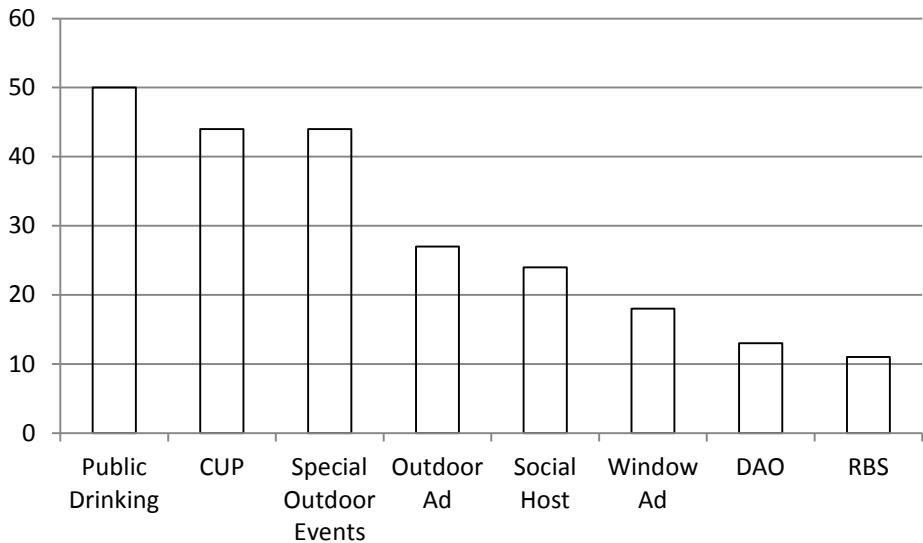

Supplement: MOESM1 [file 9628638]
